# Supplementary material for: A photo-cleavable polyprodrug-loaded wound dressing with UV-responsive antibacterial property
Source: Royal Society of Chemistry journal article supplement (doi:10.1039/c7tb01696d), 2017-01-01
Supplement: c7tb01696d1.pdf [file c7tb01696d1.pdf]

## Supporting information

### **Photo-cleavable polyprodrug-loaded wound dressing with UV-responsive antibacterial property**

Qian Pang, Xiaowen Zheng, Yu Luo, Lie Ma\*, Changyou Gao

MOE Key Laboratory of Macromolecular Synthesis and Functionalization,  
Department of Polymer Science and Engineering, Zhejiang University, Hangzhou  
310027, China

\*Corresponding author: [liema@zju.edu.cn](mailto:liema@zju.edu.cn)

#### 1. Synthesis and characterization of HMNB-PEG-HMNB

0.3g HMNB was dissolved in 4 ml NMP under an atmosphere of N<sub>2</sub>. After that, a solution of PEG diamine (0.5g) in NMP (4ml) was added dropwise. The mixture solution was intermittently vortexed and stirred until all reactants completely dissolved. The reaction was stirred for 12 h in dark at room temperature. Then, 10 times volume diethyl ether was used to precipitate the product at 0 °C. The precipitate was collected and washed with ether for three times. To further purify the product, the product was dried under vacuum and then redissolved in distilled water. The solution was dialyzed against distilled water in a dialysis tube (MWCO: 1000) for three days and lyophilized to obtain HMNB-PEG-HMNB. The conjugation degree of HMNB to PEG diamine was estimated from <sup>1</sup>H NMR ((CD<sub>3</sub>)<sub>2</sub>SO with TMS) spectra from the peaks at δ 3.4 ppm [CH in H<sub>2</sub>N-PEG-NH<sub>2</sub>] and δ 7.35 ppm [CH in HMNB].

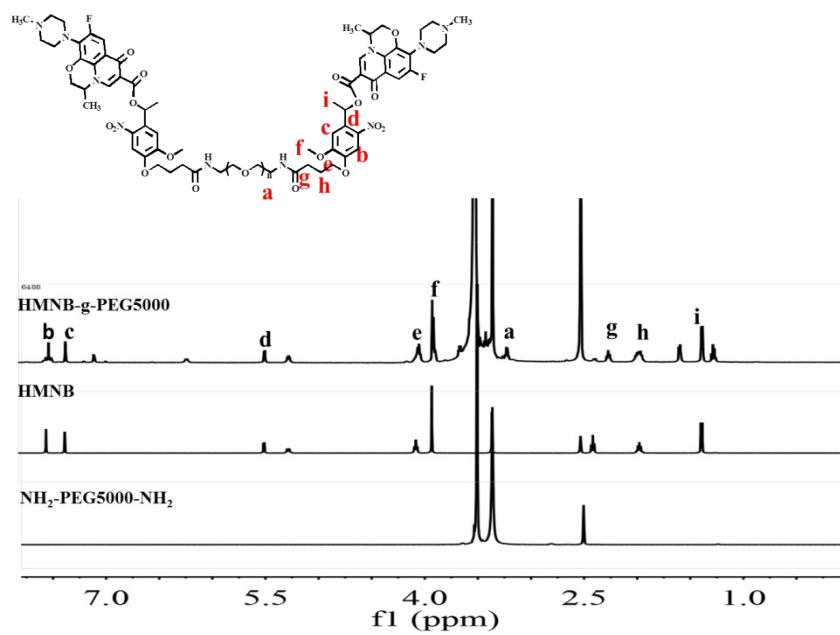

Fig. S1. <sup>1</sup>H NMR spectra (D<sub>2</sub>O with TMS) of HMNB-PEG-HMNB

2. The photo-cleavage reaction of LHP traced by UV-Vis spectra.

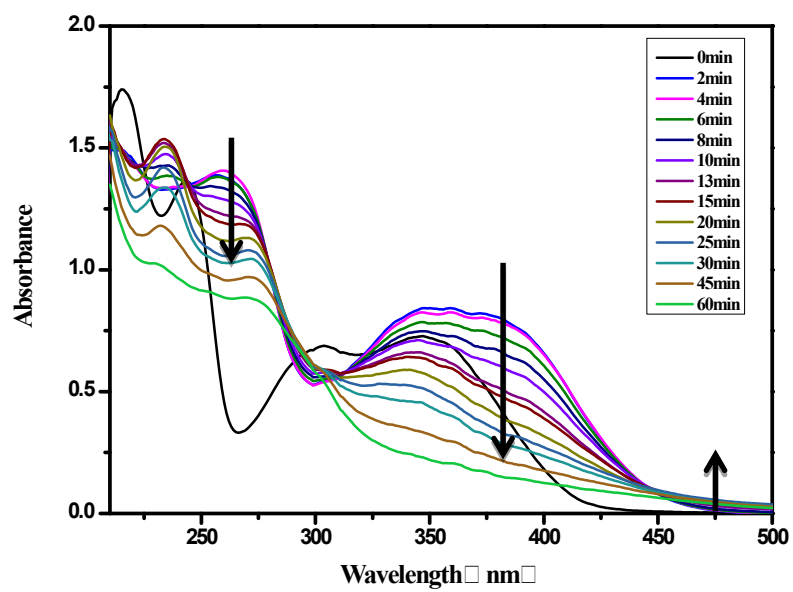

Fig. S2. UV-vis absorbance spectra of LHP with different UV irradiation time

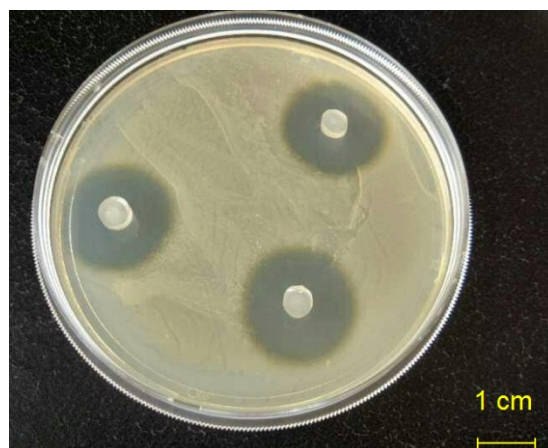

Fig. S3. Inhibition zones of the LF-loaded PVA/SA wound dressing cultured for 24h
